# Supplementary material for: Extended Linkage Disequilibrium in Noncoding Regions in a Conifer, Cryptomeria japonica
Source: Oxford University Press journal article supplement (doi:10.1534/genetics.111.136697), 2011-12-31
Supplement: 1145_figures2.pdf [file 1145_figures2.pdf]

A *NCED*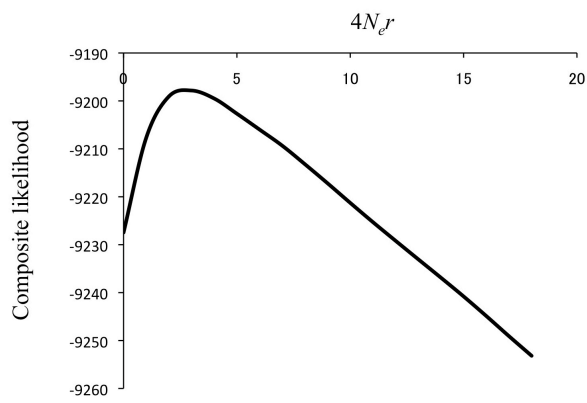B *AMT*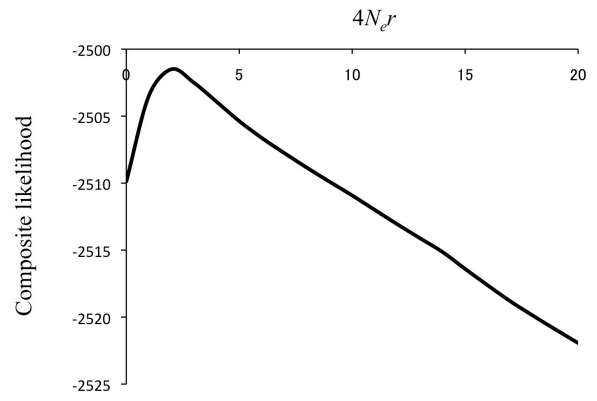C *Cal*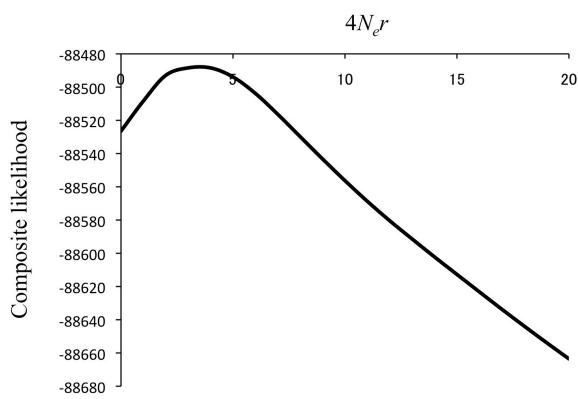D *AQU*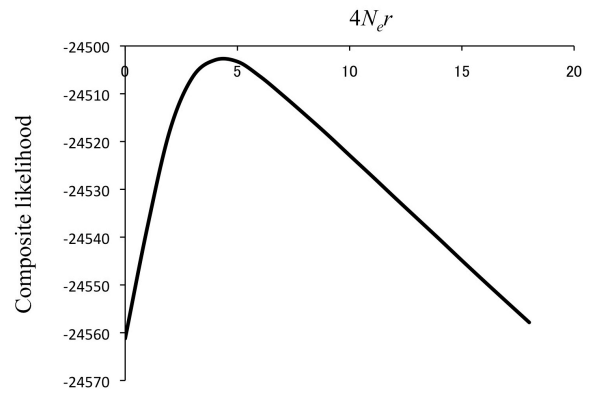E *Cryj2*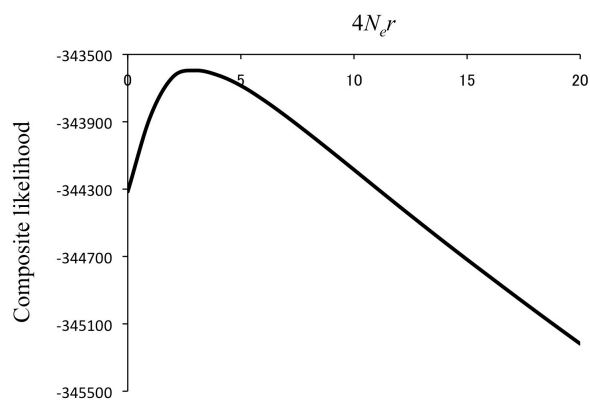

**Figure S2** Composite likelihood curves for the five nuclear genes. The likelihood curves are obtained using LDhat 2.1. The value of  $4N_e r$  at which the maximum occurs is shown in Table 1.
