# Supplementary material for: Extended Linkage Disequilibrium in Noncoding Regions in a Conifer, Cryptomeria japonica
Source: Oxford University Press journal article supplement (doi:10.1534/genetics.111.136697), 2011-12-31
Supplement: 1145_tables1.pdf [file 1145_tables1.pdf]

**Table S1 Primers used for PCR and sequencing**

| BACs | Loci    |   | Primer sequence (5'-3') | Utility                |
|------|---------|---|-------------------------|------------------------|
| BAC3 |         |   |                         |                        |
|      | Region1 | F | GGAACTTGGTGCAGGGGTTG    | first PCR              |
|      |         | R | TGTGAAGCCAGGTGGTGTCTG   | first PCR              |
|      |         | F | AGGACACCACAAAGAAGAGCAC  | nested PCR, sequencing |
|      |         | R | TCCCCCTGGGCTTGACTTAC    | nested PCR, sequencing |
|      | Region2 | F | TCCCATGCAGAGACCCACAA    | first PCR              |
|      |         | R | TGAGCACGCCAACCATTCTAG   | first PCR              |
|      |         | F | ATTCGGCACCACCAGTTTCC    | nested PCR, sequencing |
|      |         | R | GCTGAAGTTATGGTCGTATCGG  | nested PCR             |
|      |         | R | GCCTGGAATAACTCAACGAC    | sequencing             |
|      | Region3 | F | TCCACCTCTTTGTGCCCTGAC   | first PCR              |
|      |         | R | TTCCTTGCTCTGCCTCCTGAC   | first PCR              |
|      |         | F | GCCCAAAAATCCTCCAATCTG   | nested PCR             |
|      |         | R | CCGAAGTCATCCTCACCTCA    | nested PCR             |
|      |         | F | TTCCTCATCTACGAGTTGGC    | sequencing             |
|      |         | R | AGACTCCTCGCAACCATGAAG   | sequencing             |
| BAC6 |         |   |                         |                        |
|      | Region1 | F | AAATGAAGCCCTAAATGTGCC   | first PCR              |

|         |   |                           |                        |
|---------|---|---------------------------|------------------------|
|         | R | TGCCAAAACACATCCGTA        | first PCR              |
|         | F | CTTGAGATCGGCAGCCAAA       | nested PCR, sequencing |
|         | R | TGGTGTGCGAGAGAATGCAG      | nested PCR, sequencing |
| Region2 | F | GCGGGTCTTGAGAAATGAGC      | first PCR              |
|         | R | GATAGCCCAGCCACCAAATCA     | first PCR              |
|         | F | TGGTGGGTTGGACTTCTTGTC     | nested PCR, sequencing |
|         | R | TGCATCGGCATTGAATTAACATTCT | nested PCR, sequencing |
|         | F | AGCTCGCAAAGCTGATTCT       | sequencing             |
|         | R | GCACTTCTGAGTCAGCCATC      | sequencing             |
|         | R | TGGAGCCTTTTGGCATTCTG      | sequencing             |
| Region3 | F | CCTATGCTTGGGAAGTGTCG      | first PCR              |
|         | R | TGGCTGCCTGGATGTGACTG      | first PCR              |
|         | F | GTTGCTGCTGGTGGGGATT       | nested PCR             |
|         | R | TCATTGTGCGTGGATGGTCTT     | nested PCR             |
|         | F | CGTCAAAGGTGGTGAATA        | sequencing             |
|         | R | GCTGTTGTTATTCATTGTTTACC   | sequencing             |
| Region4 | F | CTGCCAGTGCTCCACACAT       | first PCR              |
|         | R | ACCATACGCCACACCCTTG       | first PCR              |
|         | F | CAGCAACGCTTGTTCACTTCC     | nested PCR, sequencing |
|         | R | GCCAGGCATGACAACCTGGTG     | nested PCR, sequencing |

|         |   |                        |                                   |
|---------|---|------------------------|-----------------------------------|
|         | F | GGCATAGTGCAGAAAGTTTA   | sequencing                        |
|         | F | TGGGATTTGCAGGAGTTTGG   | sequencing                        |
|         | R | CTTTCCTCCAGTCTGTGCCAG  | sequencing                        |
|         | R | CATTACCATGTGTCAAACCCTT | sequencing                        |
|         | F | CTGATGGCAATGGCACCTA    | sequencing                        |
|         | R | TCAAACCTGGTTGCATTGGAGA | sequencing                        |
| Region5 | F | TTGTTCTCTTCCCATGATGCT  | first PCR                         |
|         | R | CGGGACTCAGTAATAGAAACCA | first PCR                         |
|         | F | GCGAGACTCATCCCATTCCA   | nested PCR                        |
|         | R | AAACAGGCGGTAGGGCTTCA   | nested PCR                        |
|         | F | TGTGTCTCTCAAGGCAGTG    | sequencing                        |
|         | R | GGCAAAGGTGGCTGGGAAG    | sequencing                        |
| BAC7    |   |                        |                                   |
| Region1 | F | TTGGACCAGAGTTTCCTCCTTA | first PCR, nested PCR, sequencing |
|         | R | ATTGTTGACCTTTGGCTAGCAT | first PCR, nested PCR, sequencing |
| 1-1     | R | TTGGGAGTGAAGTTGGTATGG  | nested PCR, sequencing            |
| 1-2     | F | TTATTTGGTGTCGGCAAGTG   | nested PCR, sequencing            |
| Region2 | F | ACGACAGGAGGAAAGAAGCA   | first PCR, nested PCR, sequencing |
|         | R | CAGATTGTTGGTGGTGTTCG   | first PCR, nested PCR, sequencing |
| 2-1     | R | TTAGGCGAACCAGCTACTGC   | nested PCR, sequencing            |

|         |     |                      |                                   |                        |
|---------|-----|----------------------|-----------------------------------|------------------------|
| Region3 | 2-2 | F                    | GGGGGCACTTCTAGTCTTC               | nested PCR, sequencing |
|         |     | R                    | AGGGAAGGTTAGCTCCAAG               | nested PCR, sequencing |
|         | 2-3 | F                    | TGCAAATGTTGTGTGTGCTC              | nested PCR, sequencing |
|         |     | R                    | TGGAAACCTAACTGTGCCATT             | nested PCR, sequencing |
|         | 2-4 | F                    | AACCCTAATTCGCCCTTTA               | nested PCR, sequencing |
|         |     | R                    | TGGTGCAAAGCAAATGCTAA              | nested PCR, sequencing |
|         |     | F                    | TAAGGGATCAAATGGCAAGG              | sequencing             |
|         |     | R                    | CCTTGCCATTTGATCCCTTA              | sequencing             |
|         |     | F                    | GGGCCTCAAATGTTGTCC                | sequencing             |
|         |     | R                    | TGTGTGCCAATCTTTTGCAT              | sequencing             |
|         | 2-5 | F                    | TGCTTCAAAGACTGGCTTCA              | nested PCR, sequencing |
|         |     | R                    | AATTGAGAAGGACCGCATTG              | nested PCR, sequencing |
|         | 2-6 | F                    | TCTCCCTAGCATGTGGTCAA              | nested PCR, sequencing |
|         |     | R                    | TTATTAAGGCAGGGGCATGA              | nested PCR, sequencing |
|         | 2-7 | F                    | GCAGTAAACCAGCCAGGAAC              | nested PCR, sequencing |
|         |     | F                    | CAGCCTAGTGTGGCACTCA               | first PCR, sequencing  |
|         | R   | AGCGACACCCCTAAACATTG | first PCR, nested PCR, sequencing |                        |
| 3-1     | F   | GATTTGCTTGAGGCATTGGA | nested PCR, sequencing            |                        |
|         | R   | CCAAGCCCAGTCTCTTCAGC | nested PCR, sequencing            |                        |
| 3-2     | F   | AATTCGGCACTGGCATAAG  | nested PCR, sequencing            |                        |
