# Supplementary material for: Extended Linkage Disequilibrium in Noncoding Regions in a Conifer, Cryptomeria japonica
Source: Oxford University Press journal article supplement (doi:10.1534/genetics.111.136697), 2011-12-31
Supplement: 1145_tables2.pdf [file 1145_tables2.pdf]

**Table S2 Summary of nucleotide variation and the results of neutrality tests**

| Loci                    | <i>L</i>    | <i>L</i> (Nonsyn) | <i>n</i>  | <i>S</i>  | $\pi$ (Total)  | $\pi$ (Syn) | $\pi$ (Nonsyn) | Tajima's <i>D</i> | Fu and Li's <i>D</i> * | Fu and Li's <i>F</i> * | <i>R<sub>M</sub></i> |
|-------------------------|-------------|-------------------|-----------|-----------|----------------|-------------|----------------|-------------------|------------------------|------------------------|----------------------|
| BAC3                    |             |                   |           |           |                |             |                |                   |                        |                        |                      |
| Region 1                | 788         |                   | 47        | 15        | 0.00442        |             |                | 0.06980           | -1.59581               | -1.22483               | 0                    |
| Region 2                | 730         |                   | 47        | 22        | 0.00892        |             |                | 0.99867           | -0.98068               | -0.35328               | 0                    |
| Region 3                | 704         |                   | 47        | 15        | 0.00662        |             |                | 1.15529           | -1.14373               | -0.43869               | 0                    |
| <b>Total &amp; Mean</b> | <b>2222</b> |                   | <b>47</b> | <b>52</b> | <b>0.00660</b> |             |                | <b>0.85048</b>    | <b>-1.46773</b>        | <b>-0.75261</b>        | <b>0</b>             |
| BAC6                    |             |                   |           |           |                |             |                |                   |                        |                        |                      |
| Region 1                | 730         |                   | 48        | 7         | 0.00358        |             |                | 1.75357           | 0.47188                | 1.03243                | 0                    |
| Region 2                | 856         |                   | 48        | 5         | 0.00205        |             |                | 1.36207           | 0.14404                | 0.61076                | 0                    |
| coding                  | 284         | 230.84            | 48        | 1         | 0.00015        | 0           | 0.00018        | -1.10686          | -1.82907               | -1.87498               | 0                    |
| Region 3                | 822         |                   | 48        | 13        | 0.00409        |             |                | 0.44574           | -0.00424               | 0.17222                | 0                    |
| Region 4                | 1593        |                   | 48        | 7         | 0.00146        |             |                | 1.24840           | 1.24435                | 1.46202                | 0                    |
| coding                  | 390         | 322.828           | 48        | 1         | 0.00127        | 0           | 0.00160        | 1.63398           | 0.54673                | 0.99290                | 0                    |
| Region 5                | 803         |                   | 48        | 9         | 0.00249        |             |                | -0.04505          | 0.04647                | 0.01976                | 0                    |
| Coding total            | 674         | 538.667           | 48        | 2         | 0.00080        | 0           | 0.00100        | 0.34973           | -0.88132               | -0.60235               | 0                    |
| <b>Total &amp; Mean</b> | <b>4804</b> |                   | <b>48</b> | <b>41</b> | <b>0.00251</b> |             |                | <b>1.04035</b>    | <b>0.49422</b>         | <b>0.82158</b>         | <b>1</b>             |
| BAC7                    |             |                   |           |           |                |             |                |                   |                        |                        |                      |
| region1-1               | 690         |                   | 41        | 13        | 0.00425        |             |                | -0.10908          | -0.42852               | -0.38201               | 0                    |
| region1-2               | 632         |                   | 41        | 5         | 0.00092        |             |                | -1.28932          | -2.60755*              | -2.57393*              | 0                    |

|                         |             |           |            |                |                |                 |                |          |
|-------------------------|-------------|-----------|------------|----------------|----------------|-----------------|----------------|----------|
| region2-1               | 634         | 41        | 14         | 0.00439        | -0.47203       | -0.75364        | -0.77967       | 0        |
| region2-2               | 621         | 41        | 7          | 0.00315        | 0.48952        | 0.50634         | 0.587          | 0        |
| region2-3               | 642         | 41        | 3          | 0.00187        | 1.46587        | 0.91296         | 1.25162        | 0        |
| region2-4               | 2016        | 41        | 24         | 0.00361        | 1.00215        | -0.37521        | 0.10916        | 2        |
| region2-5               | 674         | 41        | 4          | 0.00149        | 0.18386        | -0.04461        | 0.02828        | 0        |
| region2-6               | 644         | 41        | 2          | 0.00127        | 1.28561        | 0.76847         | 1.06458        | 0        |
| region2-7               | 661         | 41        | 11         | 0.00266        | -0.95722       | -1.83954        | -1.82918       | 0        |
| region3-1               | 509         | 41        | 9          | 0.00619        | 1.44836        | 1.3588          | 1.62925        | 1        |
| region3-2               | 767         | 41        | 15         | 0.00445        | -0.08479       | -1.48049        | -1.20371       | 1        |
| <b>Total &amp; Mean</b> | <b>8491</b> | <b>41</b> | <b>107</b> | <b>0.00317</b> | <b>0.25972</b> | <b>-0.74551</b> | <b>-0.4592</b> | <b>7</b> |

---

$L$  : Length

$n$  : Number of sequences

$S$  : Number of segregating sites

$R_M$  : Minimum number of recombination event
